# Supplementary material for: Differential effects of silver and iron oxide nanoparticles on IAPP amyloid aggregation
Source: Royal Society of Chemistry journal article supplement (doi:10.1039/c6bm00764c), 2017-01-01
Supplement: c6bm00764c1.pdf [file c6bm00764c1.pdf]

## Supplementary Information

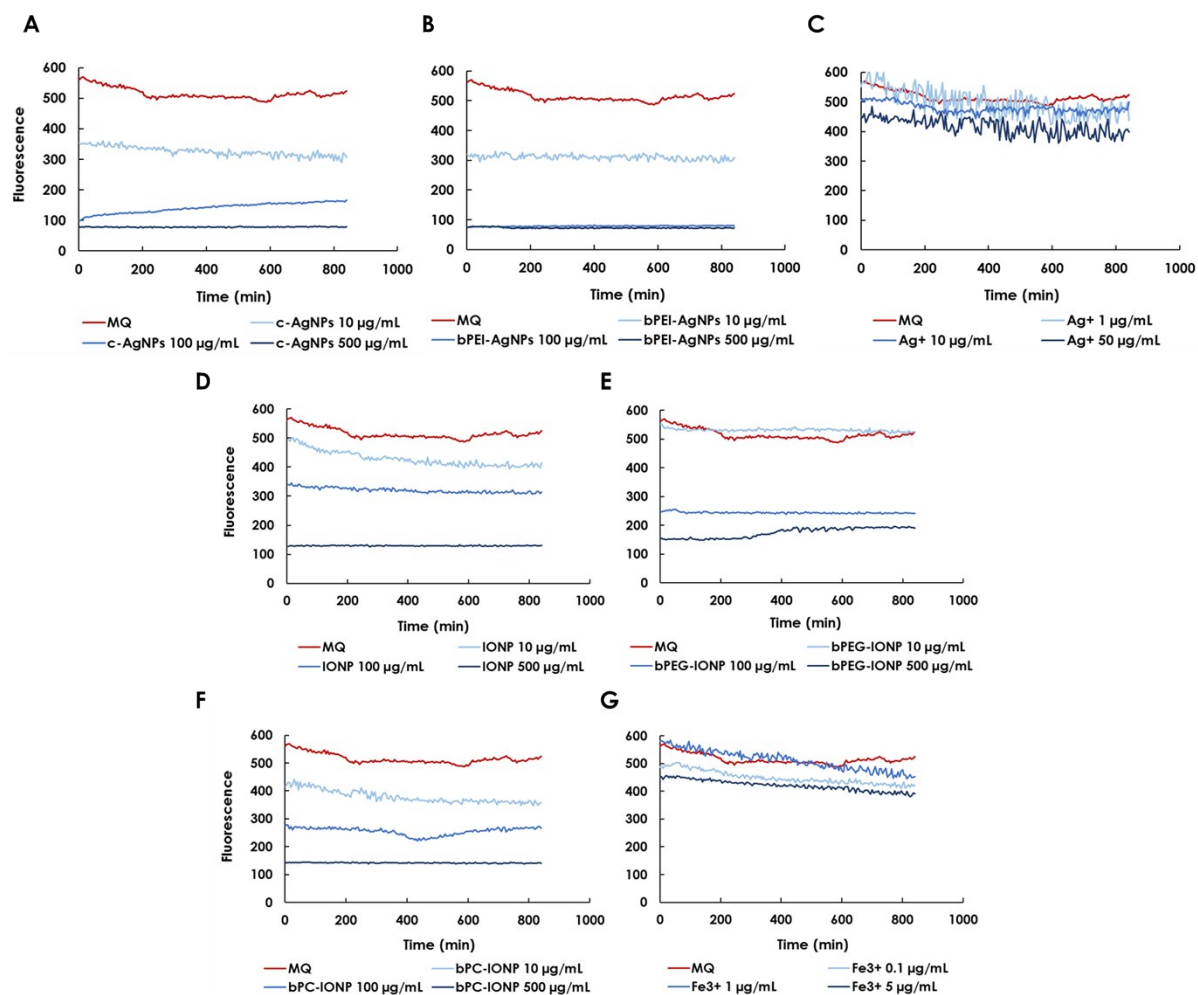

**Figure S1.** Concentration dependence of ThT fluorescence for c-AgNPs (A), bPEI-AgNPs (B), Ag<sup>+</sup> (C), bare IONPs (D), bPEG-IONPs (E), bPC-IONPs (F) and Fe<sup>3+</sup> (G). Incubation: 14 h. MQ: Milli-Q water.

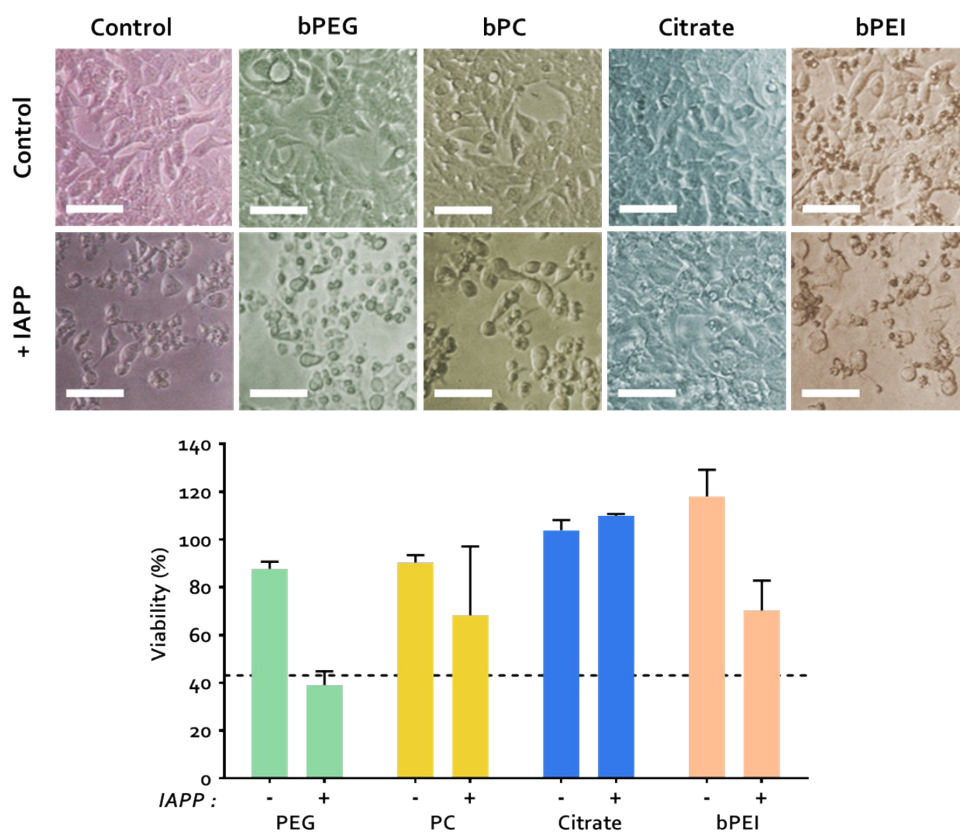

**Figure S2.** Viability of HEK293 cells treated with bPEG polymer, bPC polymer, citrate salt and bPEI after 24 h. (Top) Bright-field microscopy shows the morphology of HEK293 cells in the presence or absence of IAPP and/or treatment by the polymers and salt. (Bottom) The calcein-AM viability test was utilized as a quantitative measure of HEK293 cell viability when treated with the polymers and salt alone, or pre-incubated with IAPP. The dotted line represents viability of HEK293 cells when treated with IAPP alone (43.1%). Concentrations of polymers and citrate: 9  $\mu\text{g/mL}$ . Scale bars: 25  $\mu\text{m}$ .
